# Supplementary material for: Reliability of maternal recall of delivery and immediate newborn care indicators in Sarlahi, Nepal
Source: Springer Nature journal article supplement (doi:10.1186/s12884-021-03547-5), 2021-01-25
Supplement: MOESM1 [file 18798684]

**Supplementary material for: Reliability of maternal recall of delivery and immediate newborn care indicators in Sarlahi, Nepal**

Supplemental File 1. Questions used in initial survey

Where did the delivery take place?

- 1=At home
- 2=Maiti
- 3=At health post/clinic
- 4=In hospital
- 5=On the way to facility
- 6=Outdoors
- 9=Don't Know

Were any injections/saline given to the mother before, during or after labor?

- 0=No
- 1=Yes
- 9=Don't know

What type of injection/saline was given?

- 1=Oxytocin
- 2=Ergometrine
- 3=Vitamins
- 4=Antibiotic
- 5=Saline IV drip
- 6=Other, specify
- 9=Don't Know

Was any part of the clean birthing kit used for the delivery?

- 0=No
- 1=Yes
- 9=Don't know

Was the soap used to wash hands before delivery by the person who delivered the baby?

- 0=No
- 1=Yes
- 9=Don't know

Was the string used to tie the cord?

- 0=No
- 1=Yes
- 9=Don't know

Was the blade used to cut the cord?

- 0=No
- 1=Yes
- 9=Don't know

Was the plastic disc used when cutting the cord?

- 0=No
- 1=Yes
- 9=Don't know

Was the plastic sheet kept under the woman during delivery?

- 0=No
- 1=Yes
- 9=Don't know

During the time before the placenta came out, how was the baby cared for:

Was the child wiped with a cloth before the placenta came out?

- 0=No
- 1=Yes
- 9=Don't know

Was the child washed with water before the placenta came out?

- 0=No
- 1=Yes
- 9=Don't know

Was the child wrapped in a blanket before the placenta came out?

- 0=No
- 1=Yes
- 9=Don't know

Was the child massaged with oil before the placenta came out?

- 0=No
- 1=Yes
- 9=Don't know

Where was the baby placed before the placenta came out?

- 1 = Floor
- 2 = Bed
- 3 = Mother's Arms/Chest
- 4 = Other caretaker's arms
- 9 = Don't Know

Was the baby's cord cut before or after the placenta came out?

- 1=Before
- 2=After
- 9=Don't Know

What was used to cut the cord?

- 1= New blade
- 2= Other blade
- 3= Household knife
- 4= Sickle
- 5= Other, specify
- 9= Don't Know

Was anything applied to the cord immediately after cutting?

- 0=No
- 1=Yes
- 9=Don't know

What was applied to the cord?

- 1=Mustard oil
- 2=Sunflower oil
- 3=Ash
- 4=Mud
- 5=CHX from Kawach Tube
- 6=Other Antiseptic (eg. Betadine, Dettol)
- 7=Herbs/spices
- 8= Other, specify
- 9=Don't Know

Has the baby been breastfed since birth?

- 0=No
- 1=Yes
- 9=Don't know

How many hours passed after birth before breastfeeding was initiated?

- 00=< 1 hour
- 01-98 = hours
- 99= Don't Know

Supplemental File 2. Questions used in follow-up survey

Did you ever breastfeed (NAME)?

- 0=No
- 1=Yes
- 9=Don't know

How long after birth did you first put (NAME) to the breast?

- IF LESS THAN 1 HOUR, RECORD '00' HOURS AND '0=IMMEDIATELY'; RECORD THE HOURS OR DAYS THE WOMAN REPORTS.
- 99= Don't Know

Were any injections/saline given to you before, during or after labor?

- 0=No
- 1=Yes
- 9=Don't know

What type of injection/saline was given?

- 1=Oxytocin
- 2=Ergometrine
- 3=Vitamins
- 4=Antibiotic
- 5=Saline IV drip
- 6=Other, specify
- 9 = Don't know

Was any part of the clean birthing kit used for the delivery?

- 0=No
- 1=Yes
- 9=Don't know

Was the soap used to wash hands before delivery by the person who delivered your child?

- 0=No
- 1=Yes
- 9=Don't know

Was the string used to tie the cord?

- 0=No
- 1=Yes
- 9=Don't know

Was the blade used to cut the cord?

- 0=No
- 1=Yes
- 9=Don't know

Was the plastic disc used when cutting the cord?

- 0=No
- 1=Yes
- 9=Don't know

Was the plastic sheet kept under the woman during delivery?

- 0=No
- 1=Yes
- 9=Don't know

Were the gloves used when delivering the baby?

- 0=No
- 1=Yes
- 9=Don't know

I would now like to ask you about how the child was cared for during the time before the placenta came out:

Was the child wiped with a cloth before the placenta came out?

- 0=No
- 1=Yes
- 9=Don't know

Was the child washed with water before the placenta came out?

- 0=No
- 1=Yes
- 9=Don't know

Was the child wrapped in a blanket before the placenta came out?

- 0=No
- 1=Yes
- 9=Don't know

Was the child massaged with oil before the placenta came out?

- 0=No
- 1=Yes
- 9=Don't know

Where was the child placed before the placenta came out?

- 1 = Floor
- 2 = Bed
- 3 = Mother's Arms/Chest
- 4 = Other caretaker's arms
- 9 = Don't Know

Was the child's cord cut before or after the placenta came out?

- 1=Before
- 2=After
- 9=Don't Know

What was used to cut the cord?

- 1= New blade
- 2= Other blade
- 3= Household knife
- 4= Sickle
- 5= Other, specify
- 9= Don't Know

Was anything applied to the cord immediately after cutting?

- 0=No
- 1=Yes
- 9=Don't know

What was applied to the cord? Anything else? RECORD ALL THAT WAS APPLIED.

- 1=Mustard oil
- 2=Sunflower oil
- 3=Ash
- 4=Mud
- 5=CHX from Kawach Tube
- 6=Other Antiseptic (eg. Betadine, Dettol)
- 7=Herbs/spices
- 8=Other, specify
- 9=Don't Know

Supplemental Figure 1. Flowchart of participant selection

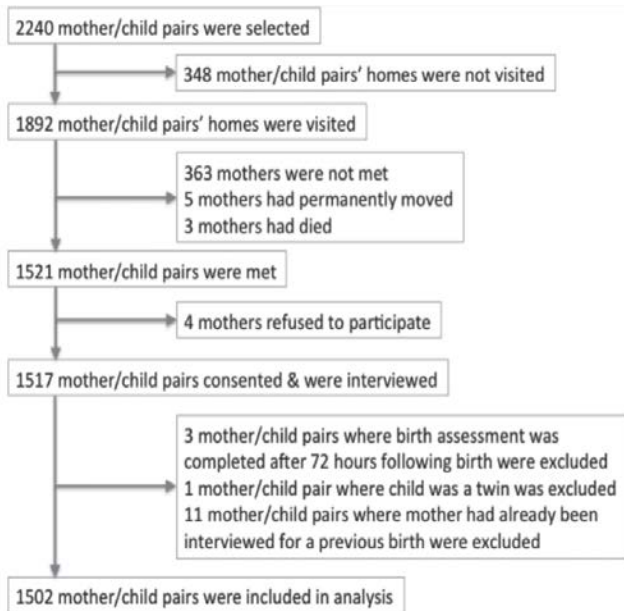

Supplemental Table 1. Characteristics of sample, stratified by site of delivery

|                                       |                  | Facility |          |              | Home |          |              |
|---------------------------------------|------------------|----------|----------|--------------|------|----------|--------------|
|                                       |                  | n        | Mean / % | 95% CI       | n    | Mean / % | 95% CI       |
| <b>Recall period (weeks)</b>          |                  | 693      | 46.1     | (43.5, 48.6) | 808  | 47.8     | (45.4, 50.2) |
| <b>Child sex</b>                      | Male             | 387      | 55.8     | (52.1, 59.5) | 447  | 55.3     | (51.9, 58.7) |
|                                       | Female           | 306      | 44.2     | (40.5, 47.9) | 361  | 44.7     | (41.3, 48.1) |
| <b>Birth complications</b>            | None             | 492      | 71.1     | (67.6, 74.4) | 738  | 91.3     | (89.2, 93.1) |
|                                       | Reported         | 200      | 28.9     | (25.6, 32.4) | 70   | 8.7      | (6.9, 10.8)  |
| <b>Parity</b>                         | Primiparous      | 288      | 41.6     | (37.9, 45.3) | 140  | 17.3     | (14.9, 20.1) |
|                                       | Second           | 172      | 24.8     | (21.7, 28.2) | 210  | 26       | (23.1, 29.1) |
|                                       | Third            | 117      | 16.9     | (14.3, 19.9) | 194  | 24       | (21.2, 27.1) |
|                                       | Fourth +         | 116      | 16.7     | (14.1, 19.7) | 264  | 32.7     | (29.5, 36)   |
| <b>Maternal Age (yrs) at delivery</b> | <20              | 197      | 28.4     | (25.2, 31.9) | 151  | 18.7     | (16.1, 21.5) |
|                                       | 20-29            | 429      | 61.9     | (58.2, 65.5) | 548  | 67.8     | (64.5, 71)   |
|                                       | 30-39            | 61       | 8.8      | (6.9, 11.2)  | 101  | 12.5     | (10.4, 15)   |
|                                       | 40+              | 6        | 0.9      | (0.4, 1.9)   | 8    | 1        | (0.5, 2)     |
| <b>Maternal education</b>             | None             | 394      | 56.9     | (53.1, 60.5) | 631  | 78.2     | (75.2, 80.9) |
|                                       | Any              | 299      | 43.1     | (39.5, 46.9) | 176  | 21.8     | (19.1, 24.8) |
| <b>Ethnicity</b>                      | Madhesi          | 653      | 94.2     | (92.2, 95.7) | 790  | 97.9     | (96.6, 98.7) |
|                                       | Pahadi           | 40       | 5.8      | (4.3, 7.8)   | 17   | 2.1      | (1.3, 3.4)   |
| <b>HH electricity</b>                 | No electricity   | 107      | 15.4     | (12.9, 18.3) | 186  | 23       | (20.3, 26.1) |
|                                       | Had electricity  | 586      | 84.6     | (81.7, 87.1) | 621  | 77       | (73.9, 79.7) |
| <b>HH latrine status</b>              | No latrine       | 448      | 64.6     | (61, 68.1)   | 619  | 76.7     | (73.7, 79.5) |
|                                       | Had latrine      | 245      | 35.4     | (31.9, 39)   | 188  | 23.3     | (20.5, 26.3) |
| <b>Land ownership</b>                 | Did not own land | 15       | 2.2      | (1.3, 3.6)   | 24   | 3        | (2, 4.4)     |
|                                       | Owens land       | 678      | 97.8     | (96.4, 98.7) | 783  | 97       | (95.6, 98)   |



Supplemental Table 2. Reliability of maternal report of immediate newborn care indicators treating “don’t know” as response category

|                                                                    | Proportion report receiving intervention |       |        |           |       |        | Observed Agreement |      |             | Expected Agreement | Kappa | K<br>+ >0.4<br>++ >0.6 |
|--------------------------------------------------------------------|------------------------------------------|-------|--------|-----------|-------|--------|--------------------|------|-------------|--------------------|-------|------------------------|
|                                                                    | Initial                                  |       |        | Follow-up |       |        | n                  | %    | 95% CI      |                    |       |                        |
|                                                                    | n                                        | % Yes | % Miss | n         | % Yes | % Miss |                    |      |             |                    |       |                        |
| Clean Birth Kit - Any Item Used                                    | 1500                                     | 70.3  | 1.2    | 1502      | 79.4  | 1.9    | 1500               | 80.3 | (78.2-82.2) | 61.2               | 0.492 | +                      |
| Clean Birth Kit - Sheet Used                                       | 1500                                     | 62.3  | 1.4    | 1502      | 68.0  | 4.3    | 1500               | 71.7 | (69.4-74.0) | 52.5               | 0.405 | +                      |
| Clean Birth Kit - Soap Used                                        | 1500                                     | 60.7  | 3.7    | 1502      | 65.0  | 5.0    | 1500               | 63.8 | (61.3-66.2) | 50.4               | 0.271 |                        |
| Any injection given during delivery                                | 1502                                     | 74.4  | 0.0    | 1502      | 68.2  | 0.1    | 1502               | 89.1 | (87.4-90.6) | 58.9               | 0.735 | ++                     |
| Injectable Oxytocin / Ergometrine given during delivery            | 1502                                     | 0.4   | 70.8   | 1502      | 0.4   | 65.2   | 1502               | 85.3 | (83.4-87.0) | 56.1               | 0.665 | ++                     |
| Newborn wrapped before placenta delivered                          | 1502                                     | 50.1  | 1.1    | 1502      | 52.9  | 10.3   | 1502               | 49.8 | (47.3-52.3) | 44.6               | 0.095 |                        |
| Newborn washed before placenta delivered                           | 1502                                     | 0.2   | 1.0    | 1502      | 4.9   | 14.4   | 1502               | 80.4 | (78.3-82.3) | 79.9               | 0.024 |                        |
| Newborn wiped with cloth before placenta delivered                 | 1502                                     | 44.2  | 1.5    | 1502      | 49.5  | 15.8   | 1502               | 48.3 | (45.8-50.9) | 41                 | 0.125 |                        |
| Newborn placed on mother’s chest or arms before placenta delivered | 1502                                     | 20.9  | 0.9    | 1502      | 15.1  | 3.4    | 1502               | 75   | (72.7-77.1) | 66.9               | 0.243 |                        |
| Cord cut after placenta delivered                                  | 1502                                     | 63.1  | 2.3    | 1502      | 63.7  | 11.9   | 1502               | 70.8 | (68.5-73.1) | 54.2               | 0.334 |                        |
| Cord cut with new blade                                            | 1502                                     | 65.2  | 5.0    | 1502      | 78.8  | 14.1   | 1502               | 69.5 | (67.1-71.8) | 69                 | 0.311 |                        |
| Anything applied to cord immediately after delivery                | 1502                                     | 92.3  | 2.5    | 1502      | 85.0  | 8.5    | 1502               | 82.1 | (80.1-83.9) | 79                 | 0.147 |                        |
| CHX applied to cord stump immediately after delivery               | 1502                                     | 86.8  | 0.1    | 1502      | 84.5  | 8.9    | 1502               | 78.4 | (76.2-80.4) | 74.2               | 0.162 |                        |
| Breastfeeding initiated in first hour                              | 1502                                     | 35.4  | 0.1    | 1502      | 29.8  | 0.6    | 1502               | 64.2 | (61.7-66.6) | 55.4               | 0.196 |                        |

Supplemental Table 3. Reliability of maternal report of immediate newborn care indicators treating “don’t know” as response category, by site of delivery

| Facility Delivery                                                  | Proportion report receiving intervention |       |        |           |       |        | Observed Agreement |      |             | Expected Agreement | Kappa  | K<br>+ >0.4<br>++ >0.6 |
|--------------------------------------------------------------------|------------------------------------------|-------|--------|-----------|-------|--------|--------------------|------|-------------|--------------------|--------|------------------------|
|                                                                    | Initial                                  |       |        | Follow-up |       |        | n                  | %    | 95% CI      |                    |        |                        |
|                                                                    | n                                        | % Yes | % Miss | n         | % Yes | % Miss |                    |      |             | %                  |        |                        |
| Clean Birth Kit - Any Item Used                                    | 691                                      | 42.8  | 2.6    | 693       | 59.9  | 3.8    | 691                | 63.1 | (59.4-66.6) | 45.6               | 0.321  |                        |
| Clean Birth Kit - Sheet Used                                       | 691                                      | 39.9  | 2.9    | 693       | 48.8  | 7.5    | 691                | 61.5 | (57.8-65.1) | 44.7               | 0.303  |                        |
| Clean Birth Kit - Soap Used                                        | 691                                      | 32.1  | 7.2    | 693       | 50.6  | 8.1    | 691                | 53.7 | (50.0-57.4) | 41.9               | 0.203  |                        |
| Any injection given during delivery                                | 693                                      | 97.0  | 0.0    | 693       | 88.2  | 0.0    | 693                | 88.9 | (86.3-91.0) | 85.9               | 0.215  |                        |
| Injectable Oxytocin / Ergometrine given during delivery            | 693                                      | 0.4   | 93.1   | 693       | 0.3   | 83.0   | 693                | 82.3 | (79.2-84.9) | 78.3               | 0.182  |                        |
| Newborn wrapped before placenta delivered                          | 693                                      | 61.0  | 2.3    | 693       | 61.6  | 13.3   | 693                | 51.8 | (48.1-55.5) | 47.1               | 0.089  |                        |
| Newborn washed before placenta delivered                           | 693                                      | 0.3   | 2.2    | 693       | 6.9   | 20.5   | 693                | 72   | (68.5-75.2) | 71.3               | 0.026  |                        |
| Newborn wiped with cloth before placenta delivered                 | 693                                      | 60.9  | 3.3    | 693       | 58.0  | 19.6   | 693                | 45.5 | (41.8-49.2) | 44                 | 0.026  |                        |
| Newborn placed on mother’s chest or arms before placenta delivered | 693                                      | 42.6  | 1.7    | 693       | 26.1  | 3.3    | 693                | 57.9 | (54.1-61.5) | 50.5               | 0.149  |                        |
| Cord cut after placenta delivered                                  | 693                                      | 21.2  | 4.8    | 693       | 32.0  | 19.0   | 693                | 47.5 | (43.8-51.2) | 43.9               | 0.063  |                        |
| Cord cut with new blade                                            | 693                                      | 27.3  | 10.4   | 693       | 56.1  | 28.7   | 693                | 36.9 | (33.4-40.6) | 27.7               | 0.127  |                        |
| Anything applied to cord immediately after delivery                | 693                                      | 88.9  | 5.3    | 693       | 73.3  | 15.4   | 693                | 69.7 | (66.2-73.0) | 66.6               | 0.092  |                        |
| CHX applied to cord stump immediately after delivery               | 693                                      | 78.2  | 0.3    | 693       | 72.4  | 16.3   | 693                | 62.5 | (58.8-66.0) | 59.1               | 0.082  |                        |
| Breastfeeding initiated in first hour                              | 693                                      | 43.9  | 0.1    | 693       | 40.0  | 0.1    | 693                | 60.5 | (56.8-64.0) | 51.1               | 0.192  |                        |
| <b>Home Delivery</b>                                               |                                          |       |        |           |       |        |                    |      |             |                    |        |                        |
| Clean Birth Kit - Any Item Used                                    | 808                                      | 93.8  | 0.0    | 808       | 96.0  | 0.4    | 808                | 95   | (93.3-96.3) | 90.3               | 0.489  | +                      |
| Clean Birth Kit - Sheet Used                                       | 808                                      | 81.4  | 0.1    | 808       | 84.4  | 1.5    | 808                | 80.6 | (77.7-83.2) | 71.3               | 0.322  |                        |
| Clean Birth Kit - Soap Used                                        | 808                                      | 85.1  | 0.7    | 808       | 77.4  | 2.4    | 808                | 72.5 | (69.3-75.5) | 68.7               | 0.121  |                        |
| Any injection given during delivery                                | 808                                      | 55.0  | 0.0    | 808       | 51.1  | 0.2    | 808                | 89.2 | (86.9-91.2) | 50                 | 0.785  | ++                     |
| Injectable Oxytocin / Ergometrine given during delivery            | 808                                      | 0.4   | 51.6   | 808       | 0.5   | 49.9   | 808                | 87.9 | (85.4-89.9) | 49.6               | 0.759  | ++                     |
| Newborn wrapped before placenta delivered                          | 808                                      | 40.6  | 0.1    | 808       | 45.3  | 7.8    | 808                | 48   | (44.6-51.5) | 46.2               | 0.034  |                        |
| Newborn washed before placenta delivered                           | 808                                      | 0.1   | 0.0    | 808       | 3.2   | 9.2    | 808                | 87.5 | (85.0-89.6) | 87.5               | -0.002 |                        |
| Newborn wiped with cloth before placenta delivered                 | 808                                      | 29.8  | 0.0    | 808       | 42.2  | 12.5   | 808                | 50.7 | (47.3-54.2) | 44.4               | 0.114  |                        |
| Newborn placed on mother’s chest or arms before placenta delivered | 808                                      | 2.4   | 0.1    | 808       | 5.7   | 3.5    | 808                | 89.6 | (87.3-91.5) | 88.7               | 0.077  |                        |
| Cord cut after placenta delivered                                  | 808                                      | 99.1  | 0.2    | 808       | 91.0  | 5.7    | 808                | 90.8 | (88.6-92.6) | 90.2               | 0.064  |                        |
| Cord cut with new blade                                            | 808                                      | 97.9  | 0.2    | 808       | 98.3  | 1.6    | 808                | 97.5 | (96.2-98.4) | 96.2               | 0.348  |                        |
| Anything applied to cord immediately after delivery                | 808                                      | 95.3  | 0.1    | 808       | 94.9  | 2.5    | 808                | 92.7 | (90.7-94.3) | 90.6               | 0.225  |                        |
| CHX applied to cord stump immediately after delivery               | 808                                      | 94.1  | 0.0    | 808       | 94.8  | 2.6    | 808                | 92   | (89.9-93.6) | 89.3               | 0.246  |                        |
| Breastfeeding initiated in first hour                              | 808                                      | 28.1  | 0.1    | 808       | 21.0  | 1.0    | 808                | 67.3 | (64.0-70.5) | 61.9               | 0.143  |                        |

Supplemental Table 4. Coverage of intervention and measures of maternal report, by site of delivery

| Facility Delivery                                                  | % Women Initially Reporting Intervention |             | Over-report<br>(% Changed Response No -> Yes) |             | Under-report<br>(% Changed Response Yes -> No) |             |
|--------------------------------------------------------------------|------------------------------------------|-------------|-----------------------------------------------|-------------|------------------------------------------------|-------------|
|                                                                    | %                                        | 95% CI      | %                                             | 95% CI      | %                                              | 95% CI      |
| Clean Birth Kit - Any Item Used                                    | 44                                       | (40.3-47.8) | 46.2                                          | (41.1-51.4) | 17.2                                           | (13.3-22.0) |
| Clean Birth Kit - Sheet Used                                       | 41.3                                     | (37.6-45.1) | 39.4                                          | (34.5-44.4) | 23.7                                           | (19.0-29.1) |
| Clean Birth Kit - Soap Used                                        | 37.7                                     | (34.2-41.5) | 45.6                                          | (40.8-50.5) | 23.3                                           | (18.4-29.0) |
| Any injection given during delivery                                | 97                                       | (95.4-98.0) | 38.1                                          | (20.0-60.3) | 10.3                                           | (8.2-12.8)  |
| Injectable Oxytocin / Ergometrine given during delivery            | 6.2                                      | (1.9-18.3)  | 0                                             | -           | 100                                            | -           |
| Newborn wrapped before placenta delivered                          | 62.5                                     | (58.8-66.1) | 64.7                                          | (58.1-70.8) | 25.5                                           | (21.4-30.2) |
| Newborn washed before placenta delivered                           | 0.3                                      | (0.1-1.2)   | 8.5                                           | (6.5-11.2)  | 50                                             | (1.9-98.1)  |
| Newborn wiped with cloth before placenta delivered                 | 63                                       | (59.3-66.6) | 70.3                                          | (63.6-76.2) | 26.8                                           | (22.4-31.8) |
| Newborn placed on mother's chest or arms before placenta delivered | 43.3                                     | (39.6-47.1) | 20.2                                          | (16.4-24.6) | 63.9                                           | (58.2-69.2) |
| Cord cut after placenta delivered                                  | 22.3                                     | (19.3-25.6) | 37.6                                          | (33.1-42.4) | 51.7                                           | (42.7-60.6) |
| Cord cut with new blade                                            | 30.4                                     | (26.9-34.2) | 71.4                                          | (65.9-76.3) | 8.2                                            | (4.8-13.6)  |
| Anything applied to cord immediately after delivery                | 93.9                                     | (91.8-95.5) | 78.6                                          | (59.4-90.2) | 12.8                                           | (10.2-15.9) |
| CHX applied to cord stump immediately after delivery               | 82.9                                     | (79.8-85.6) | 75                                            | (65.1-82.8) | 12.1                                           | (9.4-15.4)  |
| Breastfeeding initiated in first hour                              | 43.9                                     | (40.3-47.7) | 31.5                                          | (27.1-36.3) | 49.3                                           | (43.7-55.0) |
| <b>Home Delivery</b>                                               |                                          |             |                                               |             |                                                |             |
| Clean Birth Kit - Any Item Used                                    | 93.8                                     | (91.9-95.3) | 58                                            | (43.9-70.9) | 1.1                                            | (0.5-2.1)   |
| Clean Birth Kit - Sheet Used                                       | 81.6                                     | (78.7-84.1) | 61.7                                          | (53.7-69.2) | 8.6                                            | (6.7-11.1)  |
| Clean Birth Kit - Soap Used                                        | 85.9                                     | (83.3-88.1) | 67.3                                          | (58.1-75.3) | 18.3                                           | (15.6-21.4) |
| Any injection given during delivery                                | 55                                       | (51.5-58.4) | 7.7                                           | (5.4-10.9)  | 12.9                                           | (10.1-16.4) |
| Injectable Oxytocin / Ergometrine given during delivery            | 0.8                                      | (0.2-2.4)   | 0                                             | -           | -                                              | -           |
| Newborn wrapped before placenta delivered                          | 40.6                                     | (37.3-44.1) | 47.4                                          | (42.8-52.1) | 48.5                                           | (42.9-54.2) |
| Newborn washed before placenta delivered                           | 0.1                                      | (0.0-0.9)   | 3.5                                           | (2.4-5.2)   | 100                                            | -           |
| Newborn wiped with cloth before placenta delivered                 | 29.8                                     | (26.8-33.1) | 43                                            | (38.7-47.4) | 39.7                                           | (33.4-46.4) |
| Newborn placed on mother's chest or arms before placenta delivered | 2.4                                      | (1.5-3.7)   | 5.4                                           | (4.0-7.2)   | 73.7                                           | (49.5-88.9) |
| Cord cut after placenta delivered                                  | 99.4                                     | (98.5-99.7) | 80                                            | (25.7-97.9) | 3.4                                            | (2.3-5.0)   |
| Cord cut with new blade                                            | 98.1                                     | (96.9-98.9) | 90                                            | (50.5-98.8) | 0                                              | -           |
| Anything applied to cord immediately after delivery                | 95.4                                     | (93.7-96.7) | 77.1                                          | (60.3-88.3) | 1.7                                            | (1.0-3.0)   |
| CHX applied to cord stump immediately after delivery               | 94.2                                     | (92.3-95.6) | 72.1                                          | (56.8-83.5) | 2                                              | (1.2-3.3)   |
| Breastfeeding initiated in first hour                              | 28.1                                     | (25.1-31.3) | 17.3                                          | (14.4-20.6) | 68.7                                           | (62.4-74.4) |

Supplemental Table 5. Characteristics associated with maternal over-reporting

| Indicator                                   | n    | Recall period<br>(in weeks) |               | Site of delivery<br>(home [ref] vs<br>facility) |              | Delivery<br>complications<br>(no complication<br>[ref] vs<br>complications) |              | Child sex<br>(male [ref] vs<br>female) |             | Parity |             | Maternal age<br>(in years) |             | Maternal education<br>(no education [ref]<br>vs any education) |             | Maternal<br>ethnicity<br>(Madhesi [ref]<br>vs Pahadi) |             |
|---------------------------------------------|------|-----------------------------|---------------|-------------------------------------------------|--------------|-----------------------------------------------------------------------------|--------------|----------------------------------------|-------------|--------|-------------|----------------------------|-------------|----------------------------------------------------------------|-------------|-------------------------------------------------------|-------------|
|                                             |      | AOR                         | 95% CI        | AOR                                             | 95% CI       | AOR                                                                         | 95% CI       | AOR                                    | 95% CI      | AOR    | 95% CI      | AOR                        | 95% CI      | AOR                                                            | 95% CI      | AOR                                                   | 95% CI      |
| Clean Birth Kit - Any Item Used             | 408  | 1.004                       | (0.997-1.010) | 0.68                                            | (0.36-1.26)  | 0.61                                                                        | (0.39-0.96)  | 0.95                                   | (0.63-1.42) | 0.95   | (0.78-1.15) | 0.99                       | (0.93-1.05) | 0.78                                                           | (0.51-1.19) | 1.06                                                  | (0.48-2.32) |
| Clean Birth Kit - Sheet Used                | 523  | 1.005                       | (0.999-1.010) | 0.51                                            | (0.34-0.78)  | 0.65                                                                        | (0.42-1.00)  | 1.15                                   | (0.80-1.65) | 0.99   | (0.84-1.17) | 1.01                       | (0.96-1.07) | 0.66                                                           | (0.45-0.98) | 0.84                                                  | (0.38-1.86) |
| Clean Birth Kit - Soap Used                 | 513  | 1.002                       | (0.996-1.008) | 0.52                                            | (0.32-0.83)  | 0.6                                                                         | (0.39-0.91)  | 1.17                                   | (0.81-1.68) | 1.08   | (0.91-1.28) | 0.97                       | (0.92-1.02) | 0.81                                                           | (0.54-1.20) | 0.7                                                   | (0.31-1.55) |
| Any injection given                         | 384  | 1.006                       | (0.995-1.017) | 7.71                                            | (2.68-22.19) | 3.14                                                                        | (0.93-10.52) | 1.17                                   | (0.56-2.42) | 0.83   | (0.60-1.16) | 1.04                       | (0.94-1.14) | 1.17                                                           | (0.48-2.89) | 0.3                                                   | (0.03-3.02) |
| Injectable Oxytocin / Ergo given            | 370  |                             |               |                                                 |              |                                                                             |              |                                        |             |        |             |                            |             |                                                                |             |                                                       |             |
| Newborn wrapped                             | 660  | 1.003                       | (0.998-1.007) | 2.11                                            | (1.45-3.07)  | 0.92                                                                        | (0.59-1.46)  | 0.69                                   | (0.51-0.95) | 0.99   | (0.85-1.14) | 1                          | (0.95-1.04) | 0.94                                                           | (0.64-1.38) | 1.09                                                  | (0.44-2.68) |
| Newborn washed                              | 1219 | 1.006                       | (0.999-1.012) | 2.95                                            | (1.74-5.01)  | 1.06                                                                        | (0.58-1.96)  | 0.54                                   | (0.32-0.90) | 1.04   | (0.84-1.29) | 1.02                       | (0.95-1.10) | 0.87                                                           | (0.50-1.54) | 1                                                     | -           |
| Newborn wiped                               | 694  | 1.004                       | (1.000-1.009) | 3.4                                             | (2.28-5.05)  | 0.73                                                                        | (0.45-1.18)  | 0.59                                   | (0.43-0.82) | 0.97   | (0.84-1.12) | 0.99                       | (0.95-1.04) | 1.12                                                           | (0.76-1.64) | 2.16                                                  | (0.74-6.33) |
| Newborn placed on mother's<br>chest or arms | 1129 | 0.998                       | (0.992-1.004) | 3.84                                            | (2.47-5.95)  | 1.56                                                                        | (0.95-2.54)  | 0.89                                   | (0.59-1.32) | 1.08   | (0.89-1.31) | 0.96                       | (0.90-1.03) | 1.06                                                           | (0.67-1.67) | 3.03                                                  | (1.23-7.49) |
| Cord cut after placenta<br>delivered        | 424  | 1.008                       | (1.002-1.014) | 0.1                                             | (0.01-1.13)  | 1.17                                                                        | (0.73-1.85)  | 0.95                                   | (0.63-1.43) | 1.06   | (0.88-1.27) | 1                          | (0.95-1.06) | 0.8                                                            | (0.51-1.25) | 0.19                                                  | (0.05-0.71) |
| Cord cut with new blade                     | 299  | 1.011                       | (1.002-1.019) | 0.26                                            | (0.03-2.20)  | 0.65                                                                        | (0.36-1.20)  | 1.49                                   | (0.87-2.55) | 0.83   | (0.64-1.07) | 1.05                       | (0.95-1.15) | 0.78                                                           | (0.45-1.35) | 1.25                                                  | (0.46-3.46) |
| Anything applied to cord                    | 59   | 1.007                       | (0.987-1.027) | 1.15                                            | (0.30-4.39)  | 1.17                                                                        | (0.23-5.90)  | 2.14                                   | (0.48-9.48) | 1.01   | (0.61-1.68) | 1                          | (0.83-1.20) | 0.54                                                           | (0.12-2.42) | 1                                                     | -           |
| CHX applied to cord stump                   | 133  | 1.012                       | (0.997-1.027) | 1.31                                            | (0.52-3.32)  | 0.2                                                                         | (0.07-0.57)  | 1.04                                   | (0.43-2.53) | 0.96   | (0.70-1.32) | 0.99                       | (0.88-1.11) | 1.66                                                           | (0.62-4.45) | 0.6                                                   | (0.13-2.78) |
| Breastfeeding in first hour                 | 957  | 1.001                       | (0.997-1.006) | 2.34                                            | (1.68-3.26)  | 0.73                                                                        | (0.48-1.11)  | 1.2                                    | (0.88-1.63) | 0.94   | (0.82-1.09) | 1.01                       | (0.96-1.06) | 0.87                                                           | (0.61-1.26) | 1.45                                                  | (0.65-3.27) |

Supplemental Table 6. Characteristics associated with maternal over-reporting, by site of delivery

| Facility Delivery                        | n   | Recall period<br>(in weeks) |                      | Delivery complications<br>(none [ref] vs complications) |                    | Child sex<br>(male [ref] vs female) |                    | Parity |              | Maternal age<br>(in years) |             | Maternal education<br>(no education [ref] vs any education) |                    | Maternal ethnicity<br>(Madhesi [ref] vs Pahadi) |                    |
|------------------------------------------|-----|-----------------------------|----------------------|---------------------------------------------------------|--------------------|-------------------------------------|--------------------|--------|--------------|----------------------------|-------------|-------------------------------------------------------------|--------------------|-------------------------------------------------|--------------------|
|                                          |     | AOR                         | 95% CI               | AOR                                                     | 95% CI             | AOR                                 | 95% CI             | AOR    | 95% CI       | AOR                        | 95% CI      | AOR                                                         | 95% CI             | AOR                                             | 95% CI             |
| Clean Birth Kit - Any Item Used          | 358 | 1.004                       | (0.997-1.010)        | 0.63                                                    | (0.39-1.01)        | 0.91                                | (0.59-1.41)        | 1.04   | (0.84-1.29)  | 0.98                       | (0.92-1.04) | 1                                                           | (0.64-1.57)        | 1.03                                            | (0.47-2.28)        |
| Clean Birth Kit - Sheet Used             | 375 | 1.004                       | (0.997-1.010)        | 0.63                                                    | (0.39-1.02)        | 0.94                                | (0.61-1.44)        | 1.04   | (0.84-1.28)  | 0.99                       | (0.93-1.05) | 0.88                                                        | (0.56-1.38)        | 0.78                                            | (0.34-1.78)        |
| Clean Birth Kit - Soap Used              | 400 | 1.002                       | (0.995-1.008)        | <b>0.58</b>                                             | <b>(0.37-0.91)</b> | 1                                   | (0.67-1.51)        | 1.15   | (0.93-1.41)  | 0.95                       | (0.89-1.01) | 1                                                           | (0.65-1.54)        | 0.67                                            | (0.30-1.49)        |
| Any injection given                      | 18  | 0.927                       | (0.851-1.009)        | 1                                                       | -                  | 3.9E6                               | -                  | 0.59   | (0.20-1.74)  | 1.51                       | (0.90-2.52) | 8.1E7                                                       | -                  | 0.58                                            | (0.00-94.93)       |
| Injectable Oxytocin / Ergo given         | 1   |                             |                      |                                                         |                    |                                     |                    |        |              |                            |             |                                                             |                    |                                                 |                    |
| Newborn wrapped                          | 217 | 1.006                       | (0.997-1.015)        | 0.76                                                    | (0.42-1.38)        | 0.79                                | (0.45-1.40)        | 0.94   | (0.70-1.26)  | 1.02                       | (0.94-1.12) | 1.03                                                        | (0.55-1.94)        | 1.3                                             | (0.32-5.28)        |
| Newborn washed                           | 503 | 1.003                       | (0.994-1.011)        | 0.69                                                    | (0.32-1.46)        | <b>0.43</b>                         | <b>(0.22-0.84)</b> | 1.13   | (0.86-1.49)  | 1.02                       | (0.93-1.12) | 0.55                                                        | (0.27-1.14)        | 1                                               | -                  |
| Newborn wiped                            | 201 | 1.004                       | (0.994-1.014)        | 0.66                                                    | (0.34-1.28)        | <b>0.48</b>                         | <b>(0.25-0.91)</b> | 0.98   | (0.71-1.36)  | 0.98                       | (0.89-1.08) | 0.94                                                        | (0.46-1.91)        | 1.7                                             | (0.33-8.76)        |
| Newborn placed on mother's chest or arms | 371 | 0.999                       | (0.991-1.007)        | 1.5                                                     | (0.84-2.65)        | 0.98                                | (0.58-1.65)        | 1.12   | (0.86-1.45)  | 0.98                       | (0.91-1.06) | 1.55                                                        | (0.89-2.71)        | <b>3.41</b>                                     | <b>(1.17-9.94)</b> |
| Cord cut after placenta delivered        | 419 | <b>1.008</b>                | <b>(1.002-1.014)</b> | 1.17                                                    | (0.73-1.85)        | 0.93                                | (0.62-1.40)        | 1.05   | (0.87-1.26)  | 1.01                       | (0.95-1.07) | 0.82                                                        | (0.52-1.27)        | <b>0.15</b>                                     | <b>(0.03-0.65)</b> |
| Cord cut with new blade                  | 289 | <b>1.011</b>                | <b>(1.002-1.019)</b> | 0.66                                                    | (0.36-1.22)        | 1.53                                | (0.89-2.63)        | 0.89   | (0.68-1.16)  | 1.04                       | (0.94-1.14) | 0.81                                                        | (0.46-1.40)        | 1.32                                            | (0.48-3.64)        |
| Anything applied to cord                 | 24  | 1                           | (0.964-1.037)        | 0.95                                                    | (0.05-18.24)       | 25.3                                | (0.25-2519)        | 3.44   | (0.73-16.15) | 0.63                       | (0.38-1.04) | 0.3                                                         | (0.02-5.82)        | 1                                               | -                  |
| CHX applied to cord stump                | 90  | 1.008                       | (0.988-1.028)        | <b>0.13</b>                                             | <b>(0.03-0.47)</b> | 0.46                                | (0.14-1.51)        | 0.88   | (0.58-1.34)  | 0.98                       | (0.84-1.14) | 2.15                                                        | (0.61-7.65)        | 0.38                                            | (0.07-2.16)        |
| Breastfeeding in first hour              | 387 | 1.005                       | (0.999-1.011)        | 0.69                                                    | (0.42-1.12)        | 0.96                                | (0.62-1.48)        | 0.89   | (0.72-1.09)  | 1.03                       | (0.97-1.10) | 0.82                                                        | (0.51-1.32)        | 1.61                                            | (0.61-4.28)        |
| <b>Home Delivery</b>                     |     |                             |                      |                                                         |                    |                                     |                    |        |              |                            |             |                                                             |                    |                                                 |                    |
| Clean Birth Kit - Any Item Used          | 50  | 1.004                       | (0.980-1.028)        | 0.67                                                    | (0.10-4.65)        | 1.23                                | (0.31-4.86)        | 0.64   | (0.32-1.28)  | 1.01                       | (0.78-1.31) | <b>0.08</b>                                                 | <b>(0.02-0.43)</b> | 1                                               | -                  |
| Clean Birth Kit - Sheet Used             | 148 | 1.01                        | (0.999-1.021)        | 0.79                                                    | (0.28-2.24)        | 2.14                                | <b>(1.04-4.39)</b> | 0.9    | (0.67-1.21)  | 1.07                       | (0.95-1.20) | <b>0.24</b>                                                 | <b>(0.10-0.58)</b> | 1.4                                             | (0.08-24.73)       |
| Clean Birth Kit - Soap Used              | 113 | 1.003                       | (0.989-1.016)        | 0.94                                                    | (0.23-3.78)        | 2.58                                | <b>(1.08-6.17)</b> | 0.87   | (0.61-1.25)  | 1.07                       | (0.94-1.22) | <b>0.21</b>                                                 | <b>(0.07-0.65)</b> | 1                                               | -                  |
| Any injection given                      | 356 | 1.009                       | (0.998-1.020)        | 1.76                                                    | (0.36-8.50)        | 1.28                                | (0.59-2.79)        | 0.83   | (0.56-1.21)  | 1                          | (0.89-1.12) | 0.81                                                        | (0.28-2.33)        | 1                                               | -                  |
| Injectable Oxytocin / Ergo given         | 349 |                             |                      |                                                         |                    |                                     |                    |        |              |                            |             |                                                             |                    |                                                 |                    |
| Newborn wrapped                          | 443 | 1.001                       | (0.996-1.007)        | 1.2                                                     | (0.59-2.47)        | 0.64                                | (0.44-0.93)        | 1      | (0.84-1.19)  | 0.98                       | (0.93-1.04) | 0.87                                                        | (0.53-1.44)        | 0.91                                            | (0.26-3.16)        |
| Newborn washed                           | 716 | 1.01                        | (0.999-1.021)        | <b>3.33</b>                                             | <b>(1.25-8.84)</b> | 0.75                                | (0.33-1.69)        | 0.81   | (0.55-1.20)  | 1.07                       | (0.95-1.20) | 2.27                                                        | (0.93-5.56)        | 1                                               | -                  |
| Newborn wiped                            | 493 | 1.005                       | (0.999-1.010)        | 0.8                                                     | (0.39-1.66)        | <b>0.64</b>                         | <b>(0.44-0.92)</b> | 0.96   | (0.81-1.12)  | 1                          | (0.95-1.06) | 1.23                                                        | (0.77-1.95)        | 2.59                                            | (0.64-10.42)       |
| Newborn placed on mother's chest or arms | 758 | 0.996                       | (0.986-1.005)        | 2.11                                                    | (0.83-5.35)        | 0.77                                | (0.40-1.47)        | 1.05   | (0.78-1.42)  | 0.93                       | (0.83-1.03) | 0.42                                                        | (0.16-1.13)        | 2.32                                            | (0.28-19.50)       |
| Cord cut after placenta delivered        | 5   |                             |                      |                                                         |                    |                                     |                    |        |              |                            |             |                                                             |                    |                                                 |                    |
| Cord cut with new blade                  | 10  |                             |                      |                                                         |                    |                                     |                    |        |              |                            |             |                                                             |                    |                                                 |                    |
| Anything applied to cord                 | 35  | 1.008                       | (0.977-1.040)        | 1.69                                                    | (0.09-33.22)       | 1.97                                | (0.23-16.85)       | 0.75   | (0.36-1.57)  | 1.19                       | (0.86-1.64) | 0.34                                                        | (0.02-4.88)        | 1                                               | -                  |
| CHX applied to cord stump                | 42  | 1.009                       | (0.983-1.036)        | 0.48                                                    | (0.05-5.02)        | 4.97                                | (0.85-29.12)       | 0.88   | (0.49-1.58)  | 1.05                       | (0.84-1.30) | 0.48                                                        | (0.06-3.67)        | 1                                               | -                  |
| Breastfeeding in first hour              | 570 | 0.998                       | (0.992-1.004)        | 0.81                                                    | (0.37-1.79)        | 1.52                                | (0.98-2.36)        | 1      | (0.82-1.22)  | 0.99                       | (0.92-1.05) | 0.92                                                        | (0.52-1.64)        | 1.08                                            | (0.22-5.22)        |

Supplemental Table 7. Characteristics associated with maternal under-reporting

| Indicator                                   | n    | Recall period<br>(in weeks) |               | Site of delivery<br>(home [ref] vs<br>facility) |               | Delivery<br>complications<br>(no complication<br>[ref] vs<br>complications) |             | Child sex<br>(male [ref] vs<br>female) |             | Parity |             | Maternal age<br>(in years) |             | Maternal education<br>(no education [ref]<br>vs any education) |             | Maternal<br>ethnicity<br>(Madhesi [ref] vs<br>Pahadi) |              |
|---------------------------------------------|------|-----------------------------|---------------|-------------------------------------------------|---------------|-----------------------------------------------------------------------------|-------------|----------------------------------------|-------------|--------|-------------|----------------------------|-------------|----------------------------------------------------------------|-------------|-------------------------------------------------------|--------------|
|                                             |      | AOR                         | 95% CI        | AOR                                             | 95% CI        | AOR                                                                         | 95% CI      | AOR                                    | 95% CI      | AOR    | 95% CI      | AOR                        | 95% CI      | AOR                                                            | 95% CI      | AOR                                                   | 95% CI       |
| Clean Birth Kit - Any Item Used             | 1044 | 1.008                       | (1.000-1.016) | 17.62                                           | (8.03-38.67)  | 1.63                                                                        | (0.84-3.14) | 0.84                                   | (0.47-1.49) | 1.14   | (0.87-1.49) | 0.95                       | (0.87-1.04) | 1.1                                                            | (0.57-2.12) | 3.5                                                   | (0.88-13.91) |
| Clean Birth Kit - Sheet Used                | 929  | 1.003                       | (0.997-1.008) | 3.03                                            | (2.00-4.58)   | 1.45                                                                        | (0.86-2.45) | 0.78                                   | (0.52-1.17) | 1.06   | (0.89-1.26) | 1                          | (0.94-1.06) | 1.36                                                           | (0.86-2.15) | 1.51                                                  | (0.50-4.53)  |
| Clean Birth Kit - Soap Used                 | 939  | 1.004                       | (1.000-1.009) | 1.25                                            | (0.86-1.81)   | 1.26                                                                        | (0.79-2.01) | 1.01                                   | (0.73-1.40) | 1.02   | (0.88-1.18) | 1                          | (0.95-1.05) | 1.14                                                           | (0.77-1.68) | 1.94                                                  | (0.79-4.77)  |
| Any injection given                         | 1112 | 0.999                       | (0.993-1.004) | 0.87                                            | (0.59-1.28)   | 0.85                                                                        | (0.53-1.37) | 1.36                                   | (0.93-1.97) | 1.01   | (0.85-1.19) | 1.03                       | (0.98-1.08) | 0.73                                                           | (0.47-1.14) | 0.67                                                  | (0.20-2.27)  |
| Injectable Oxytocin / Ergo given            | 1    |                             |               |                                                 |               |                                                                             |             |                                        |             |        |             |                            |             |                                                                |             |                                                       |              |
| Newborn wrapped                             | 671  | 1.003                       | (0.999-1.008) | 0.38                                            | (0.27-0.53)   | 1.24                                                                        | (0.79-1.95) | 0.94                                   | (0.68-1.32) | 1.09   | (0.93-1.26) | 0.99                       | (0.95-1.04) | 0.8                                                            | (0.55-1.17) | 1.56                                                  | (0.65-3.71)  |
| Newborn washed                              | 551  | 1.003                       | (0.998-1.009) | 0.59                                            | (0.40-0.87)   | 1.33                                                                        | (0.83-2.13) | 0.91                                   | (0.63-1.32) | 1.18   | (0.99-1.40) | 0.99                       | (0.94-1.05) | 1.07                                                           | (0.70-1.64) | 0.45                                                  | (0.13-1.58)  |
| Newborn wiped                               | 306  | 1.009                       | (1.002-1.016) | 0.63                                            | (0.21-1.85)   | 1.03                                                                        | (0.57-1.85) | 0.8                                    | (0.49-1.31) | 1.2    | (0.95-1.52) | 0.96                       | (0.89-1.02) | 1.02                                                           | (0.60-1.75) | 0.44                                                  | (0.18-1.10)  |
| Newborn placed on mother's<br>chest or arms | 873  | 1.001                       | (0.993-1.009) | 30.83                                           | (17.38-54.71) | 0.45                                                                        | (0.19-1.06) | 1.03                                   | (0.59-1.77) | 0.78   | (0.57-1.05) | 0.98                       | (0.89-1.07) | 0.74                                                           | (0.39-1.40) | 1.53                                                  | (0.34-6.95)  |
| Cord cut after placenta delivered           | 158  | 1.008                       | (0.992-1.025) | 1                                               | -             | 0.97                                                                        | (0.22-4.20) | 0.61                                   | (0.18-2.13) | 2.34   | (1.11-4.91) | 0.69                       | (0.51-0.94) | 1.2                                                            | (0.31-4.67) | 1                                                     | -            |
| Cord cut with new blade                     | 1284 | 1.001                       | (0.994-1.008) | 8.32                                            | (4.45-15.54)  | 1.51                                                                        | (0.88-2.59) | 0.8                                    | (0.49-1.28) | 1.07   | (0.86-1.34) | 0.96                       | (0.90-1.04) | 0.74                                                           | (0.43-1.25) | 0.65                                                  | (0.15-2.87)  |
| Anything applied to cord                    | 1206 | 1                           | (0.992-1.007) | 6.92                                            | (3.78-12.67)  | 1.13                                                                        | (0.62-2.06) | 0.85                                   | (0.52-1.39) | 0.97   | (0.76-1.24) | 1                          | (0.92-1.08) | 0.88                                                           | (0.51-1.53) | 0.32                                                  | (0.04-2.50)  |
| CHX applied to cord stump                   | 530  | 1.006                       | (1.000-1.011) | 0.41                                            | (0.28-0.60)   | 1.5                                                                         | (0.92-2.44) | 1.43                                   | (0.99-2.06) | 0.94   | (0.79-1.11) | 1.02                       | (0.97-1.07) | 1.04                                                           | (0.69-1.56) | 0.27                                                  | (0.10-0.68)  |
| Breastfeeding in first hour                 | 1044 | 1.008                       | (1.000-1.016) | 17.62                                           | (8.03-38.67)  | 1.63                                                                        | (0.84-3.14) | 0.84                                   | (0.47-1.49) | 1.14   | (0.87-1.49) | 0.95                       | (0.87-1.04) | 1.1                                                            | (0.57-2.12) | 3.5                                                   | (0.88-13.91) |

Supplemental Table 8. Characteristics associated with maternal under-reporting, by site of delivery

| Facility Delivery                        | n   | Recall period<br>(in weeks) |               | Delivery complications<br>(none [ref] vs complications) |             | Child sex<br>(male [ref] vs female) |             | Parity |             | Maternal age<br>(in years) |             | Maternal education<br>(no education [ref] vs any education) |             | Maternal ethnicity<br>(Madhesi [ref] vs Pahadi) |              |
|------------------------------------------|-----|-----------------------------|---------------|---------------------------------------------------------|-------------|-------------------------------------|-------------|--------|-------------|----------------------------|-------------|-------------------------------------------------------------|-------------|-------------------------------------------------|--------------|
|                                          |     | AOR                         | 95% CI        | AOR                                                     | 95% CI      | AOR                                 | 95% CI      | AOR    | 95% CI      | AOR                        | 95% CI      | AOR                                                         | 95% CI      | AOR                                             | 95% CI       |
| Clean Birth Kit - Any Item Used          | 291 | 1.008                       | (1.000-1.017) | 1.78                                                    | (0.89-3.55) | 0.78                                | (0.41-1.48) | 1.01   | (0.74-1.36) | 0.99                       | (0.90-1.09) | 1.03                                                        | (0.50-2.09) | 4.14                                            | (0.88-19.59) |
| Clean Birth Kit - Sheet Used             | 274 | 1.009                       | (1.001-1.017) | 1.8                                                     | (0.94-3.41) | 0.88                                | (0.49-1.58) | 0.96   | (0.73-1.25) | 1.01                       | (0.93-1.10) | 1.24                                                        | (0.65-2.37) | 4                                               | (0.83-19.16) |
| Clean Birth Kit - Soap Used              | 249 | 1.008                       | (1.000-1.017) | 1.45                                                    | (0.72-2.92) | 1.01                                | (0.54-1.88) | 1.13   | (0.84-1.52) | 0.94                       | (0.85-1.04) | 1.17                                                        | (0.59-2.32) | 8.2                                             | (1.38-48.65) |
| Any injection given                      | 671 | 0.996                       | (0.989-1.004) | 0.6                                                     | (0.33-1.11) | 1.25                                | (0.76-2.07) | 0.89   | (0.70-1.11) | 1.06                       | (0.99-1.13) | 0.81                                                        | (0.47-1.40) | 0.24                                            | (0.03-1.80)  |
| Injectable Oxytocin / Ergo given         | 1   |                             |               |                                                         |             |                                     |             |        |             |                            |             |                                                             |             |                                                 |              |
| Newborn wrapped                          | 372 | 1.005                       | (0.999-1.012) | 1.11                                                    | (0.64-1.95) | 0.97                                | (0.60-1.57) | 0.92   | (0.73-1.16) | 1.02                       | (0.95-1.09) | 0.82                                                        | (0.49-1.36) | 1.43                                            | (0.54-3.76)  |
| Newborn washed                           | 2   |                             |               |                                                         |             |                                     |             |        |             |                            |             |                                                             |             |                                                 |              |
| Newborn wiped                            | 339 | 1.008                       | (1.001-1.015) | 1.44                                                    | (0.82-2.53) | 0.86                                | (0.52-1.41) | 1.01   | (0.81-1.25) | 1.03                       | (0.96-1.10) | 1.17                                                        | (0.69-1.99) | 0.52                                            | (0.14-1.91)  |
| Newborn placed on mother's chest or arms | 287 | 1.008                       | (1.000-1.015) | 1.11                                                    | (0.61-2.00) | 0.81                                | (0.49-1.34) | 1.22   | (0.96-1.55) | 0.96                       | (0.89-1.03) | 1.12                                                        | (0.65-1.93) | 0.53                                            | (0.21-1.36)  |
| Cord cut after placenta delivered        | 118 | 0.992                       | (0.981-1.003) | 0.43                                                    | (0.16-1.15) | 1.23                                | (0.57-2.65) | 0.83   | (0.53-1.29) | 0.97                       | (0.85-1.11) | 1.03                                                        | (0.44-2.41) | 4.05                                            | (0.41-40.10) |
| Cord cut with new blade                  | 158 | 1.008                       | (0.992-1.025) | 0.97                                                    | (0.22-4.20) | 0.61                                | (0.18-2.13) | 2.34   | (1.11-4.91) | 0.69                       | (0.51-0.94) | 1.2                                                         | (0.31-4.67) | -                                               |              |
| Anything applied to cord                 | 532 | 1.002                       | (0.994-1.009) | 1.67                                                    | (0.95-2.92) | 0.85                                | (0.50-1.43) | 1.04   | (0.82-1.33) | 0.98                       | (0.90-1.06) | 0.66                                                        | (0.37-1.17) | 0.75                                            | (0.17-3.37)  |
| CHX applied to cord stump                | 463 | 1.001                       | (0.993-1.010) | 1.26                                                    | (0.67-2.34) | 0.72                                | (0.41-1.28) | 0.94   | (0.70-1.25) | 1                          | (0.92-1.09) | 0.79                                                        | (0.43-1.45) | 0.37                                            | (0.05-2.89)  |
| Breastfeeding in first hour              | 303 | 1.001                       | (0.994-1.008) | 1.54                                                    | (0.91-2.62) | 1.35                                | (0.85-2.17) | 0.93   | (0.74-1.17) | 1.01                       | (0.94-1.08) | 1.05                                                        | (0.64-1.74) | 0.31                                            | (0.11-0.91)  |
| <b>Home Delivery</b>                     |     |                             |               |                                                         |             |                                     |             |        |             |                            |             |                                                             |             |                                                 |              |
| Clean Birth Kit - Any Item Used          | 673 | 1.005                       | (0.986-1.024) | 1                                                       | -           | 1.33                                | (0.32-5.51) | 2.01   | (1.13-3.58) | 0.77                       | (0.60-1.00) | 1.39                                                        | (0.25-7.58) | 1                                               | -            |
| Clean Birth Kit - Sheet Used             | 640 | 0.996                       | (0.988-1.004) | 0.45                                                    | (0.11-1.91) | 0.76                                | (0.43-1.35) | 1.15   | (0.91-1.47) | 0.98                       | (0.91-1.07) | 1.5                                                         | (0.78-2.89) | 1                                               | -            |
| Clean Birth Kit - Soap Used              | 690 | 1.002                       | (0.997-1.007) | 1                                                       | -           | 1.05                                | (0.71-1.55) | 0.99   | (0.83-1.19) | 1.01                       | (0.96-1.07) | 1.11                                                        | (0.69-1.80) | 0.9                                             | (0.25-3.27)  |
| Any injection given                      | 441 | 1.002                       | (0.994-1.010) | 1.52                                                    | (0.70-3.28) | 1.4                                 | (0.79-2.49) | 1.18   | (0.91-1.52) | 0.99                       | (0.91-1.08) | 0.53                                                        | (0.23-1.23) | 2.97                                            | (0.57-15.49) |
| Injectable Oxytocin / Ergo given         | 0   |                             |               |                                                         |             |                                     |             |        |             |                            |             |                                                             |             |                                                 |              |
| Newborn wrapped                          | 299 | 1.001                       | (0.995-1.008) | 1.47                                                    | (0.67-3.23) | 0.93                                | (0.58-1.48) | 1.26   | (1.01-1.56) | 0.97                       | (0.91-1.04) | 0.73                                                        | (0.41-1.30) | 1.61                                            | (0.22-12.04) |
| Newborn washed                           | 1   |                             |               |                                                         |             |                                     |             |        |             |                            |             |                                                             |             |                                                 |              |
| Newborn wiped                            | 209 | 0.998                       | (0.990-1.006) | 1                                                       | (0.41-2.46) | 1.02                                | (0.57-1.80) | 1.57   | (1.16-2.12) | 0.93                       | (0.85-1.02) | 0.89                                                        | (0.42-1.88) | 1                                               | -            |
| Newborn placed on mother's chest or arms | 17  |                             |               |                                                         |             |                                     |             |        |             |                            |             |                                                             |             |                                                 |              |
| Cord cut after placenta delivered        | 741 | 1.01                        | (0.999-1.021) | 0.8                                                     | (0.18-3.56) | 0.86                                | (0.38-1.91) | 0.74   | (0.48-1.14) | 0.97                       | (0.86-1.11) | 0.37                                                        | (0.11-1.27) | 1                                               | -            |
| Cord cut with new blade                  | 785 |                             |               |                                                         |             |                                     |             |        |             |                            |             |                                                             |             |                                                 |              |
| Anything applied to cord                 | 677 | 0.997                       | (0.981-1.014) | 1                                                       | -           | 0.59                                | (0.18-1.93) | 1.22   | (0.71-2.08) | 0.89                       | (0.74-1.08) | 1.41                                                        | (0.41-4.87) | 1                                               | -            |
| CHX applied to cord stump                | 669 | 0.994                       | (0.978-1.009) | 1                                                       | -           | 1.53                                | (0.55-4.29) | 1.11   | (0.70-1.75) | 0.99                       | (0.85-1.15) | 1.46                                                        | (0.44-4.92) | 1                                               | -            |
| Breastfeeding in first hour              | 227 | 1.013                       | (1.004-1.023) | 1.32                                                    | (0.34-5.06) | 1.63                                | (0.88-3.03) | 0.94   | (0.72-1.23) | 1.04                       | (0.95-1.13) | 0.87                                                        | (0.43-1.78) | 0.18                                            | (0.03-1.19)  |
